# Supplementary material for: Socioeconomic disparities in head and neck cancer survival in Germany: a causal mediation analysis using population-based cancer registry data
Source: PubMed Central journal article supplement (PMC8021523; doi:10.1007/s00432-021-03537-2), 2021-02-11
Supplement: 432_2021_3537_MOESM1_ESM.pdf [file 432_2021_3537_MOESM1_ESM.pdf]

## **Socioeconomic disparities in head and neck cancer survival in Germany: A causal mediation analysis using population-based cancer registry data.**

Bedir, Ahmed<sup>1</sup>; Abera, Semaw Ferede<sup>1</sup>; Efremov, Ljupcho<sup>1,2</sup>; Hassan, Lamiaa<sup>2</sup>; Vordermark, Dirk<sup>1,3</sup>; Medenwald, Daniel<sup>1,3</sup>

1. Department of Radiation Oncology, Health Services Research Group, University Hospital Halle (Saale), Ernst-Grube-Str. 40, 06120, Halle (Saale), Germany.
2. Institute of Medical Epidemiology, Biometry, and Informatics, Martin Luther University Halle-Wittenberg, Magdeburger Strasse 8, 06112, Halle (Saale), Germany
3. Department of Radiation Oncology, University Hospital Halle (Saale), Ernst-Grube-Str. 40, 06120, Halle (Saale), Germany.

### **Address for correspondence:**

Daniel Medenwald

Department of Radiation Oncology, University Hospital Halle (Saale),  
Ernst-Grube-Str. 40, 06120, Halle (Saale), Germany.

Telephone no: +49-345-557-3453/4027

Email: [Daniel.Medenwald@uk-halle.de](mailto:Daniel.Medenwald@uk-halle.de)

**Appendix 1: Treating Tumor Site as a confounder: Sensitivity Analysis.**

**Table 1.** Cox proportional hazards model analyses.

| <b>Deprivation Quintile</b><br><i>(vs Reference Quintile 1)</i> | <b>Hazard Ratio*</b> | <b>95% CI</b> |
|-----------------------------------------------------------------|----------------------|---------------|
| Quintile 2                                                      | 1.08                 | 1.00-1.17     |
| Quintile 3                                                      | 1.11                 | 1.03-1.20     |
| Quintile 4                                                      | 1.12                 | 1.04-1.21     |
| Quintile 5                                                      | 1.24                 | 1.16-1.33     |

\*Adjusted for age, sex, year of diagnosis, and tumor site.

Abbreviations: CI=Confidence interval.

**Table 2.** Effect of Socioeconomic (SE) deprivation and mediators on odds of deaths at different times since head and neck diagnosis including tumor site as an additional confounder.

|                 |                                             | <b>Deprivation Level</b>                                 |                         |                         |                         |
|-----------------|---------------------------------------------|----------------------------------------------------------|-------------------------|-------------------------|-------------------------|
|                 |                                             | <b>Odds Ratio <sup>a</sup> (95%CI) (vs reference Q1)</b> |                         |                         |                         |
|                 |                                             | <b>Q2</b>                                                | <b>Q3</b>               | <b>Q4</b>               | <b>Q5</b>               |
| <b>6 months</b> | Direct Effect (SE Deprivation) <sup>a</sup> | 1.17 (0.94-1.42)                                         | 1.14 (0.92-1.38)        | 1.32 (1.09-1.57)        | 1.37 (1.14-1.64)        |
|                 | Mediator 1 (Medical Care) <sup>b</sup>      | 1.02 (0.99-1.04)                                         | 0.99 (0.97-1.00)        | 1.00 (0.97-1.04)        | 0.99 (0.98-1.00)        |
|                 | M2 (Stage at Diagnosis) <sup>c</sup>        | 1.07 (0.98-1.19)                                         | 1.14 (1.04-1.26)        | 1.32 (1.22-1.45)        | 1.45 (1.33-1.58)        |
|                 | M3 (Treatment) <sup>d</sup>                 | 0.97 (0.95-0.98)                                         | 0.96 (0.95-0.98)        | 0.93 (0.91-0.95)        | 0.92 (0.90-0.94)        |
|                 | <b>Total Effect (TE)</b>                    | <b>1.24 (0.99-1.53)</b>                                  | <b>1.23 (1.00-1.51)</b> | <b>1.63 (1.35-1.95)</b> | <b>1.81 (1.51-2.16)</b> |
| <b>1 year*</b>  | DE (SE Deprivation)                         | 1.18 (0.99-1.39)                                         | 1.14 (0.96-1.34)        | 1.13 (0.96-1.32)        | 1.34 (1.17-1.56)        |
|                 | M1 (Medical Care)                           | 0.99 (0.97-1.01)                                         | 1.00 (0.99-1.02)        | 1.01 (0.98-1.04)        | 1.00 (0.98-1.01)        |
|                 | M2 (Stage at Diagnosis)                     | 0.98 (0.93-1.05)                                         | 0.99 (0.93-1.07)        | 1.08 (1.01-1.15)        | 1.08 (1.01-1.15)        |
|                 | M3 (Treatment)                              | 0.98 (0.97-0.99)                                         | 0.97 (0.96-0.99)        | 0.95 (0.94-0.97)        | 0.95 (0.94-0.96)        |
|                 | <b>TE</b>                                   | <b>1.12 (0.95-1.33)</b>                                  | <b>1.10 (0.93-1.30)</b> | <b>1.17 (1.00-1.37)</b> | <b>1.37 (1.19-1.59)</b> |
| <b>2 years*</b> | DE (SE Deprivation)                         | 1.21 (0.99-1.38)                                         | 1.25 (1.09-1.43)        | 1.14 (0.98-1.31)        | 1.30 (1.14-1.48)        |
|                 | M1 (Medical Care)                           | 0.99 (0.97-1.01)                                         | 1.01 (1.00-1.02)        | 1.01 (0.98-1.04)        | 1.00 (0.99-1.02)        |
|                 | M2 (Stage at Diagnosis)                     | 0.94 (0.88-0.99)                                         | 0.98 (0.92-1.05)        | 1.00 (0.95-1.07)        | 1.01 (0.95-1.05)        |
|                 | M3 (Treatment)                              | 0.98 (0.98-0.99)                                         | 0.97 (0.95-0.98)        | 0.97 (0.96-0.98)        | 0.96 (0.95-0.97)        |
|                 | <b>TE</b>                                   | <b>1.11 (0.95-1.27)</b>                                  | <b>1.20 (1.04-1.37)</b> | <b>1.11 (0.96-1.28)</b> | <b>1.27 (1.10-1.43)</b> |
| <b>5 years*</b> | DE (SE Deprivation)                         | 1.00 (0.85-1.17)                                         | 1.14 (0.98-1.33)        | 1.09 (0.94-1.26)        | 1.33 (1.15-1.51)        |
|                 | M1 (Medical Care)                           | 1.00 (0.97-1.02)                                         | 0.98 (0.96-1.00)        | 1.02 (0.99-1.05)        | 1.00 (0.98-1.01)        |
|                 | M2 (Stage at Diagnosis)                     | 0.97 (0.89-1.03)                                         | 0.96 (0.87-1.04)        | 0.96 (0.90-1.04)        | 0.96 (0.91-1.05)        |
|                 | M3 (Treatment)                              | 1.00 (0.99-1.01)                                         | 1.01 (1.00-1.03)        | 0.98 (0.97-0.99)        | 0.99 (0.98-1.00)        |
|                 | <b>TE</b>                                   | <b>0.97 (0.81-1.12)</b>                                  | <b>1.09 (0.92-1.27)</b> | <b>1.05 (0.90-1.23)</b> | <b>1.26 (1.11-1.47)</b> |

<sup>a</sup> Adjusted for age, sex, and year of diagnosis and tumor site.

<sup>b</sup> The natural direct effect odds ratio of exposure to socioeconomic deprivation levels in different quintiles on odds of death through neither medical care, stage at diagnosis, or treatment.

<sup>c</sup> The natural indirect effect odds ratio mediated by exposure induced changes in medical care.

<sup>d</sup> The partial indirect effect odds ratio mediated by exposure induced changes in stage at diagnosis.

<sup>e</sup> The partial indirect effect odds ratio mediated by exposure induced changes in treatment received.

\* Conditional to surviving previous time point. Abbreviations: CI= Confidence interval, Q= Quintile. SE= Socioeconomic deprivation
