# Supplementary material for: Socioeconomic disparities in head and neck cancer survival in Germany: a causal mediation analysis using population-based cancer registry data
Source: Springer Nature journal article supplement (doi:10.1007/s00432-021-03537-2), 2021-02-11
Supplement: MOESM2 [file 18855868]

## **Socioeconomic disparities in head and neck cancer survival in Germany: A causal mediation analysis using population-based cancer registry data.**

Bedir, Ahmed<sup>1</sup>; Abera, Semaw Ferede<sup>1</sup>; Efremov, Ljupcho<sup>1,2</sup>; Hassan, Lamiaa<sup>2</sup>; Vordermark, Dirk<sup>1,3</sup>; Medenwald, Daniel<sup>1,3</sup>

1. Department of Radiation Oncology, Health Services Research Group, University Hospital Halle (Saale), Ernst-Grube-Str. 40, 06120, Halle (Saale), Germany.
2. Institute of Medical Epidemiology, Biometry, and Informatics, Martin Luther University Halle-Wittenberg, Magdeburger Strasse 8, 06112, Halle (Saale), Germany
3. Department of Radiation Oncology, University Hospital Halle (Saale), Ernst-Grube-Str. 40, 06120, Halle (Saale), Germany.

### **Address for correspondence:**

Daniel Medenwald

Department of Radiation Oncology, University Hospital Halle (Saale),  
Ernst-Grube-Str. 40, 06120, Halle (Saale), Germany.

Telephone no: +49-345-557-3453/4027

Email: [Daniel.Medenwald@uk-halle.de](mailto:Daniel.Medenwald@uk-halle.de)

## Appendix 2: Missing Data: Sensitivity Analysis

**Table 1.** Proportion of missing information of stage at diagnosis and treatment received.

|                               | All patients | Deprivation Level |      |      |      |               |
|-------------------------------|--------------|-------------------|------|------|------|---------------|
|                               |              | Least Deprived    | 2    | 3    | 4    | Most Deprived |
| <b>Stage at Diagnosis (%)</b> |              |                   |      |      |      |               |
| Stage I                       | 14.5         | 15.4              | 14.7 | 13.3 | 14.5 | 14.3          |
| Stage II                      | 11.1         | 10.2              | 11.8 | 11.2 | 11.1 | 11.2          |
| Stage III                     | 15.2         | 14.4              | 16.4 | 15.8 | 14.8 | 15.0          |
| Stage IV                      | 54.6         | 53.6              | 51.3 | 54.4 | 55.5 | 57.6          |
| Missing                       | 4.6          | 6.2               | 5.9  | 5.2  | 4.0  | 1.9           |
| <b>Treatment (%)</b>          |              |                   |      |      |      |               |
| Minor                         | 13.1         | 5.0               | 8.5  | 13.5 | 18.5 | 19.5          |
| Advanced                      | 58.1         | 45.7              | 49.4 | 58.4 | 63.4 | 71.8          |
| Missing                       | 28.8         | 49.3              | 42.1 | 28.1 | 18.2 | 8.6           |

**Table 2.** Logistic regression showing association of missing treatment information and age and deprivation quintile and their interactions.

| <b>Coefficients</b> | <b>Odds Ratio</b> | <b>95% CI</b> | <b>P-value</b> |
|---------------------|-------------------|---------------|----------------|
| Age                 | 1.01              | 1.00-1.02     | <0.001         |
| Quintile 1          | Reference         | ---           | ----           |
| Quintile 2          | 0.73              | 0.46-1.14     | 0.16           |
| Quintile 3          | 0.74              | 0.45-1.21     | 0.24           |
| Quintile 4          | 0.20              | 0.12-0.33     | <0.001         |
| Quintile 5          | 0.07              | 0.04-0.12     | <0.001         |
| Age*Quintile 2      | 1.00              | 0.99-1.01     | 0.88           |
| Age*Quintile 3      | 0.99              | 0.98-1.00     | 0.02           |
| Age*Quintile 4      | 1.00              | 0.99-1.01     | 0.51           |
| Age*Quintile 5      | 1.00              | 1.00-1.01     | 0.13           |

\*Interaction

Abbreviations: CI=Confidence interval.

**Table 3.** Stepwise logistic regression to determine variables that were associated the most with missing treatment information.

| <b>Coefficients</b> | <b>Odds Ratio</b> | <b>95% CI</b> | <b>P-value</b> |
|---------------------|-------------------|---------------|----------------|
| Age                 | 1.01              | 1.00-1.01     | <0.001         |
| Sex (male)          | 0.95              | 0.89-1.02     | 0.14           |
| Quintile 1          | Reference         | ---           | ---            |
| Quintile 2          | 0.73              | 0.68-0.79     | <0.001         |
| Quintile 3          | 0.39              | 0.36-0.43     | <0.001         |
| Quintile 4          | 0.23              | 0.21-0.25     | <0.001         |
| Quintile5           | 0.10              | 0.09-0.11     | <0.001         |
| Stage I             | Reference         | ---           | ---            |
| Stage II            | 0.78              | 0.71-0.87     | <0.001         |
| Stage III           | 0.58              | 0.52-0.63     | <0.001         |
| Stage IV            | 0.54              | 0.50-0.59     | <0.001         |
| Medical care        | 0.99              | 0.98-1.00     | <0.001         |

Abbreviations: CI=Confidence interval.

**Table 4.** Effect of Socioeconomic deprivation and mediators on odds of deaths at different times since head and neck diagnosis based on five imputed datasets.

|                 |                                      | <b>Deprivation Level</b>                                 |                         |                         |                         |
|-----------------|--------------------------------------|----------------------------------------------------------|-------------------------|-------------------------|-------------------------|
|                 |                                      | <b>Odds Ratio <sup>a</sup> (95%CI) (vs reference Q1)</b> |                         |                         |                         |
|                 |                                      | <b>Q2</b>                                                | <b>Q3</b>               | <b>Q4</b>               | <b>Q5</b>               |
| <b>6 months</b> | DE (SE Deprivation) <sup>a</sup>     | 1.18 (1.10-1.28)                                         | 1.14 (1.05-1.22)        | 1.31 (1.23-1.40)        | 1.36 (1.28-1.44)        |
|                 | M1 (Medical Care) <sup>b</sup>       | 1.02 (1.01-1.03)                                         | 0.99 (0.98-1.00)        | 1.00 (0.99-1.02)        | 0.99 (0.98-0.99)        |
|                 | M2 (Stage at Diagnosis) <sup>c</sup> | 1.09 (1.06-1.13)                                         | 1.14 (1.11-1.19)        | 1.32 (1.27-1.37)        | 1.42 (1.38-1.47)        |
|                 | M3 (Treatment) <sup>d</sup>          | 0.96 (0.95-0.97)                                         | 0.96 (0.95-0.97)        | 0.93 (0.92-0.94)        | 0.93 (0.92-0.93)        |
|                 | <b>Total Effect (TE)</b>             | <b>1.28 (1.18-1.39)</b>                                  | <b>1.24 (1.14-1.34)</b> | <b>1.60 (1.50-1.72)</b> | <b>1.76 (1.65-1.88)</b> |
| <b>1 year*</b>  | DE (SE Deprivation)                  | 1.21 (1.13-1.29)                                         | 1.14 (1.07-1.22)        | 1.14 (1.07-1.23)        | 1.36 (1.29-1.44)        |
|                 | M1 (Medical Care)                    | 0.99 (0.98-1.00)                                         | 1.00 (1.00-1.01)        | 1.01 (1.00-1.02)        | 1.00 (0.99-1.01)        |
|                 | M2 (Stage at Diagnosis)              | 0.98 (0.96-1.00)                                         | 1.01 (0.99-1.04)        | 1.09 (1.06-1.12)        | 1.06 (1.04-1.09)        |
|                 | M3 (Treatment)                       | 0.98 (0.97-0.98)                                         | 0.97 (0.96-0.97)        | 0.95 (0.94-0.96)        | 0.96 (0.95-0.96)        |
|                 | <b>TE</b>                            | <b>1.16 (1.08-1.23)</b>                                  | <b>1.12 (1.05-1.20)</b> | <b>1.19 (1.13-1.28)</b> | <b>1.38 (1.31-1.46)</b> |
| <b>2 years*</b> | DE (SE Deprivation)                  | 1.24 (1.17-1.31)                                         | 1.25 (1.18-1.33)        | 1.15 (1.08-1.21)        | 1.34 (1.29-1.41)        |
|                 | M1 (Medical Care)                    | 0.99 (0.98-1.00)                                         | 1.00 (1.00-1.01)        | 1.01 (1.00-1.02)        | 1.00 (1.00-1.01)        |
|                 | M2 (Stage at Diagnosis)              | 0.95 (0.94-0.98)                                         | 0.99 (0.96-1.00)        | 0.99 (0.97-1.02)        | 1.01 (0.99-1.02)        |
|                 | M3 (Treatment)                       | 0.98 (0.98-0.99)                                         | 0.97 (0.96-0.97)        | 0.97 (0.96-0.97)        | 0.97 (0.96-0.97)        |
|                 | <b>TE</b>                            | <b>1.15 (1.08-1.21)</b>                                  | <b>1.20 (1.12-1.27)</b> | <b>1.12 (1.06-1.18)</b> | <b>1.32 (1.25-1.37)</b> |
| <b>5 years*</b> | DE (SE Deprivation)                  | 1.01 (0.95-1.08)                                         | 1.10 (1.04-1.18)        | 1.07 (1.00-1.13)        | 1.30 (1.24-1.37)        |
|                 | M1 (Medical Care)                    | 1.00 (0.99-1.01)                                         | 0.98 (0.97-0.99)        | 1.02 (1.01-1.03)        | 1.00 (0.99-1.00)        |
|                 | M2 (Stage at Diagnosis)              | 0.99 (0.96-1.02)                                         | 0.99 (0.96-1.02)        | 0.96 (0.93-0.99)        | 0.95 (0.93-0.98)        |
|                 | M3 (Treatment)                       | 1.00 (0.99-1.00)                                         | 1.01 (1.01-1.02)        | 0.98 (0.97-0.98)        | 0.99 (0.99-1.00)        |
|                 | <b>TE</b>                            | <b>1.00 (0.94-1.07)</b>                                  | <b>1.08 (1.02-1.16)</b> | <b>1.03 (0.96-1.09)</b> | <b>1.23 (1.17-1.29)</b> |

<sup>a</sup> Adjusted for age, sex, and year of diagnosis.

<sup>b</sup> The natural direct effect odds ratio of exposure to socioeconomic deprivation levels in different quintiles on odds of death through neither medical care, stage at diagnosis, or treatment.

<sup>c</sup> The natural indirect effect odds ratio mediated by exposure induced changes in medical care.

<sup>d</sup> The partial indirect effect odds ratio mediated by exposure induced changes in stage at diagnosis.

<sup>e</sup> The partial indirect effect odds ratio mediated by exposure induced changes in treatment received.

\* Conditional to surviving previous time point.

Abbreviations: CI= Confidence interval, Q= Quintile. SE= Socioeconomic deprivation
